# Supplementary material for: Moss Bags as Biomonitors of Atmospheric Microplastic Deposition in Urban Environments
Source: MDPI journal article supplement (doi:10.3390/biology12020149), 2023-01-18
Supplement: s1 [file s1]

## Supplementary Materials

### Moss bags as biomonitors of atmospheric microplastic deposition in urban environments

Carter Bertrim and Julian Aherne \*

School of Environment, Trent University, Peterborough, ON K9L 0G2, Canada

\* Correspondence: jaherne@trentu.ca

#### Supplementary Materials: Figures and Tables

Figure S1. Examples of microplastics identified in moss bags (a) dark coloured fibre from Lansdowne Peterborough (PTB), (b) dark coloured fibre from Port Union (GTA), (c) red coloured fragment from Resources Road (GTA), (d) dark coloured film from Sunnyside Lakefront (TOR), bright blue film from University of Toronto St. George (TOR), (f) white microplastic bead from undeployed moss bag (CON). Beads such as this (one of three in total) were quantified as microplastic fragments for the purpose of this study. Material stuck to microplastics is residual organic material post-digestion.

Table S1. Climate data from the nearest meteorological monitoring station to deployed moss bag groups during the study period October 9 to November 23, 2020 (45 days). Temperature in the PTB site grouping ranged from  $-9.9^{\circ}\text{C}$  to  $24.8^{\circ}\text{C}$  with 31.0 mm of precipitation over 19 days, GTA ranged from  $-7.5^{\circ}\text{C}$  to  $24.5^{\circ}\text{C}$  with 64.1 mm of precipitation over 29 days, and TOR ranged from  $-4.8^{\circ}\text{C}$  to  $22.8^{\circ}\text{C}$  with 37.0 mm of precipitation over 22 days.

Table S2. Count and length (mm) of microplastic particles found in procedural open-air blanks, digestion blanks,  $\text{H}_2\text{O}_2$ , B-Pure, and Fe (II) solution blanks. This potential contamination from  $\text{H}_2\text{O}_2$ , B-Pure, and Fe (II) solutions was eliminated via filtration. Open-air blanks were used through all steps where samples were vulnerable to exposure (average exposure time 5 hours).

Table S3. Count of fibres, fragments (including tire fragments), and films in each moss bag (see Table 1 for details on Site ID). The dry weight (g) of moss added to each bag pre-deployment and a subset for post-deployment is also given.

Table S4. Particle type, length (L), and width (W) of microplastic particles (mm) found in moss bags across the Peterborough (PTB,  $n = 6$ ), Greater Toronto Area (GTA,  $n = 8$ ), Toronto (TOR,  $n = 4$ ), and Warsaw Caves Conservation Area (CON,  $n = 5$ ) urban intensity groups.

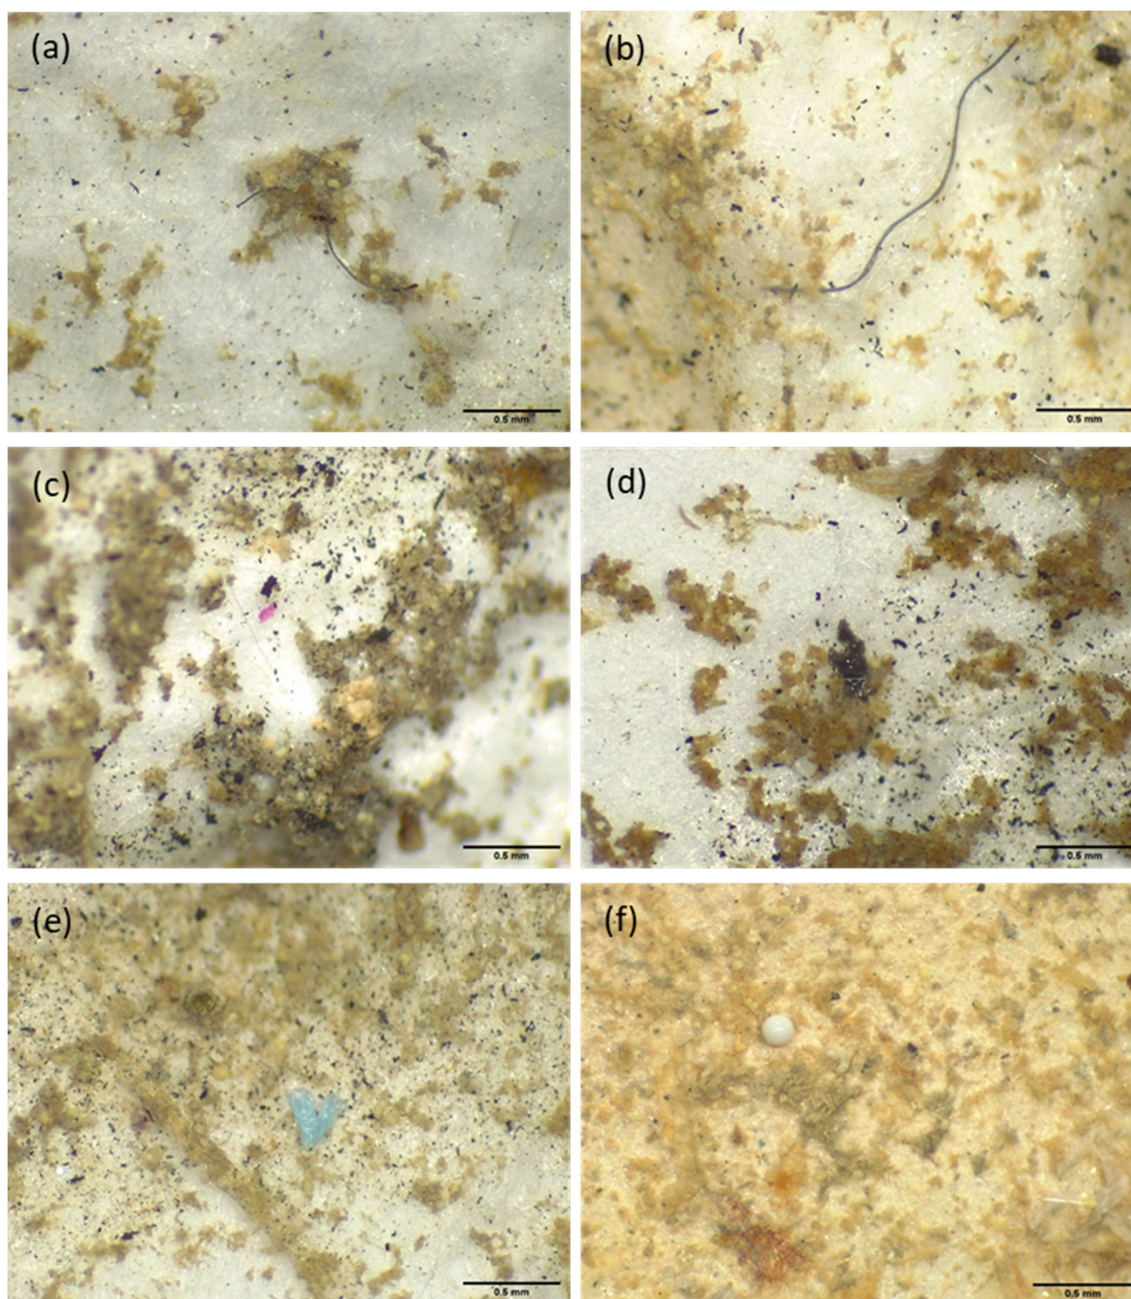

Figure S1. Examples of microplastics identified in moss bags (a) dark coloured fibre from Lansdowne Peterborough (PTB), (b) dark coloured fibre from Port Union (GTA), (c) red coloured fragment from Resources Road (GTA), (d) dark coloured film from Sunnyside Lakefront (TOR), (e) bright blue film from University of Toronto St. George (TOR), (f) white microplastic bead from undeployed moss bag (CON). Beads such as this (one of three in total) were quantified as microplastic fragments for the purpose of this study. Material stuck to microplastics is residual organic material post-digestion.

Table S1. Climate data from the nearest meteorological monitoring station to deployed moss bag groups during the study period October 9 to November 23, 2020 (45 days). Temperature in the PTB site grouping ranged from  $-9.9^{\circ}\text{C}$  to  $24.8^{\circ}\text{C}$  with 31.0 mm of precipitation over 19 days, GTA ranged from  $-7.5^{\circ}\text{C}$  to  $24.5^{\circ}\text{C}$  with 64.1 mm of precipitation over 29 days, and TOR ranged from  $-4.8^{\circ}\text{C}$  to  $22.8^{\circ}\text{C}$  with 37.0 mm of precipitation over 22 days.

| Station Name                            | PTBO      | GTA       | TOR       | Average |
|-----------------------------------------|-----------|-----------|-----------|---------|
| Latitude ( $^{\circ}$ )                 | 44.23000  | 43.78000  | 43.67000  |         |
| Longitude ( $^{\circ}$ )                | -78.36000 | -79.47000 | -79.40000 |         |
| Mean Temperature ( $^{\circ}\text{C}$ ) | 5.79      | 7.29      | 8.84      | 7.31    |
| Min Temperature ( $^{\circ}\text{C}$ )  | -9.9      | -7.5      | -4.8      | -7.4    |
| Max Temperature ( $^{\circ}\text{C}$ )  | 24.8      | 24.5      | 22.8      | 24.0    |
| Total Precipitation (mm)                | 30.97     | 64.09     | 36.96     | 44.01   |
| Days of Precipitation (count)           | 19        | 29        | 22        |         |

Table S2. Count and length (mm) of microplastic particles found in procedural open-air blanks, digestion blanks, H<sub>2</sub>O<sub>2</sub>, B-Pure, and Fe (II) solution blanks. This potential contamination from H<sub>2</sub>O<sub>2</sub>, B-Pure, and Fe (II) solutions was eliminated via filtration. Open-air blanks were used through all steps where samples were vulnerable to exposure (average exposure time 5 hours).

| Blanks                        | Number | Particle | Length (mm) |
|-------------------------------|--------|----------|-------------|
| Air                           | 1      | 1        | 0.9         |
|                               | 1      | 2        | 2.487       |
|                               | 2      | 0        | –           |
|                               | 3      | 1        | 0.509       |
|                               | 4      | 0        | –           |
| Digestion                     | 1      | 1        | 0.434       |
|                               | 1      | 2        | 0.423       |
|                               | 2      | 0        | –           |
|                               | 3      | 0        | –           |
|                               | 4      | 0        | –           |
| H <sub>2</sub> O <sub>2</sub> | 1      | 0        | –           |
|                               | 2      | 1        | 0.082       |
|                               | 2      | 2        | 0.311       |
| B-Pure                        | 1      | 1        | 1.186       |
|                               | 2      | 0        | –           |
| Fe (II)                       | 1      | 1        | 1.026       |
|                               | 1      | 2        | 0.489       |
|                               | 1      | 3        | 3.292       |
|                               | 2      | 0        | –           |

Table S3. Count of fibres, fragments (including tire fragments), and films in each moss bag (see Table 1 for details on Site ID). The dry weight (g) of moss added to each bag pre-deployment and a subset for post-deployment is also given.

| Site | Bag | Pre weight (g) | Post-weight (g) | Fibres | Fragments | Tire | Films | Total |
|------|-----|----------------|-----------------|--------|-----------|------|-------|-------|
| 1    | 1   | 1.0617         | 0.9165          | 4      | 0         | 1    | 1     | 6     |
| 1    | 2   | 0.9845         | 0.8674          | 2      | 2         | 1    | 0     | 5     |
| 2    | 3   | 0.9815         |                 | 6      | 0         | 0    | 1     | 7     |
| 2    | 4   | 0.9954         |                 | 5      | 3         | 0    | 1     | 9     |
| 3    | 5   | 0.9891         |                 | 2      | 1         | 0    | 0     | 3     |
| 3    | 6   | 0.9945         |                 | 4      | 3         | 0    | 0     | 7     |
| 4    | 7   | 1.0120         | 0.876           | 9      | 7         | 0    | 0     | 16    |
| 4    | 8   | 1.0105         |                 | 6      | 7         | 0    | 1     | 14    |
| 5    | 9   | 1.0054         | 0.9129          | 7      | 1         | 0    | 0     | 8     |
| 5    | 10  | 1.0600         |                 | 5      | 4         | 0    | 0     | 9     |
| 6    | 11  | 1.0220         |                 | 1      | 8         | 0    | 3     | 12    |
| 6    | 12  | 1.0074         |                 | 6      | 4         | 1    | 0     | 11    |
| 7    | 13  | 1.0012         | 1.2255          | 11     | 11        | 0    | 0     | 22    |
| 7    | 14  | 1.0194         |                 | 5      | 3         | 0    | 4     | 12    |
| 8    | 15  | 1.0271         | 9.7267          | 7      | 2         | 0    | 3     | 12    |
| 8    | 16  | 1.0017         |                 | 2      | 2         | 1    | 4     | 9     |
| 9    | 17  | 1.0303         | 0.9119          | 5      | 2         | 1    | 5     | 13    |
| 9    | 18  | 1.0211         |                 | 1      | 4         | 3    | 3     | 11    |
| 10   | 19  | 1.0536         |                 | 3      | 0         | 0    | 0     | 3     |
| 10   | 20  | 1.0035         |                 | 2      | 0         | 0    | 0     | 2     |
| 10   | 21  | 1.0029         |                 | 4      | 1         | 0    | 0     | 5     |
| 10   | 22  | 1.0435         |                 | 2      | 0         | 0    | 0     | 2     |
| 10   | 23  | 1.0562         |                 | 2      | 0         | 0    | 0     | 2     |

Table S4. Particle type, length (L), and width (W) of microplastic particles (mm) found in moss bags across the Peterborough (PTB, n = 6), Greater Toronto Area (GTA, n = 8), Toronto (TOR, n = 4), and Warsaw Caves Conservation Area (CON, n = 5) urban intensity groups.

| PTB (mm) |       |       | GTA (mm) |        |   | TOR (mm) |       |       | CON (mm) |       |
|----------|-------|-------|----------|--------|---|----------|-------|-------|----------|-------|
| Type     | L     | W     | Type     | L      | W | Type     | L     | W     | Type     | L     |
| fr       | 0.954 |       | fr       | 0.868  |   | fr       | 0.468 |       | fr       | 2.045 |
| fr       | 1.19  |       | fr       | 0.679  |   | fr       | 0.79  |       | fr       | 1.999 |
| fr       | 0.456 |       | fr       | 0.471  |   | fr       | 2.001 |       | fr       | 3.898 |
| fr       | 0.366 |       | fr       | 5.878  |   | fr       | 2.482 |       | fr       | 0.67  |
| fr       | 0.854 |       | fr       | 2.072  |   | fr       | 0.379 |       | fr       | 2.42  |
| fr       | 0.632 |       | fr       | 1.548  |   | fr       | 1.781 |       | fr       | 4.277 |
| fr       | 1.508 |       | fr       | 1.818  |   | fr       | 1.122 |       | fr       | 1.051 |
| fr       | 0.251 |       | fr       | 0.222  |   | fr       | 1.141 |       | fr       | 5.402 |
| fr       | 1.032 |       | fr       | 3.504  |   | fr       | 3.476 |       | fr       | 1.487 |
| fr       | 4.506 |       | fr       | 2.856  |   | fr       | 0.313 |       | fr       | 2.364 |
| fr       | 1.621 |       | fr       | 0.526  |   | fr       | 0.575 |       | fr       | 3.3   |
| fr       | 2.219 |       | fr       | 0.785  |   | fr       | 1.607 |       | fr       | 1.232 |
| fr       | 0.479 |       | fr       | 1.079  |   | fr       | 2.116 |       | fr       | 1.593 |
| fr       | 0.522 |       | fr       | 2.289  |   | fm       | 0.189 | 0.137 | fg       | 0.144 |
| fr       | 4.295 |       | fr       | 0.289  |   | fm       | 1.207 | 0.706 |          |       |
| fr       | 1.797 |       | fr       | 1.013  |   | fm       | 0.584 | 0.395 |          |       |
| fr       | 2.047 |       | fr       | 1.577  |   | fm       | 0.09  | 0.046 |          |       |
| fr       | 0.965 |       | fr       | 0.546  |   | fm       | 0.631 | 0.033 |          |       |
| fr       | 7.593 |       | fr       | 12.307 |   | fm       | 0.12  | 0.065 |          |       |
| fr       | 3.409 |       | fr       | 0.256  |   | fm       | 0.087 | 0.066 |          |       |
| fr       | 1.249 |       | fr       | 3.784  |   | fm       | 0.097 | 0.085 |          |       |
| fr       | 3.582 |       | fr       | 1.221  |   | fm       | 0.091 | 0.048 |          |       |
| fr       | 1.41  |       | fr       | 1.134  |   | fm       | 0.033 | 0.03  |          |       |
| fm       | 0.272 | 0.109 | fr       | 0.82   |   | fm       | 0.731 | 0.028 |          |       |
| fm       | 0.122 | 0.019 | fr       | 0.591  |   | fm       | 0.062 | 0.052 |          |       |
| fm       | 0.055 | 0.05  | fr       | 0.877  |   | fm       | 0.115 | 0.071 |          |       |
| fg       | 0.443 | 0.443 | fr       | 0.564  |   | fm       | 0.073 | 0.037 |          |       |
| fg       | 0.094 | 0.048 | fr       | 1.031  |   | fm       | 0.108 | 0.072 |          |       |
| fg       | 0.098 | 0.016 | fr       | 0.49   |   | fg       | 0.446 | 0.266 |          |       |
| fg       | 0.221 | 0.045 | fr       | 0.287  |   | fg       | 0.675 | 0.109 |          |       |
| fg       | 0.261 | 0.024 | fr       | 3.302  |   | fg       | 1.154 | 0.4   |          |       |
| fg       | 0.63  | 0.316 | fr       | 0.665  |   | fg       | 0.297 | 0.27  |          |       |
| fg       | 0.318 | 0.047 | fr       | 0.158  |   | fg       | 0.151 | 0.068 |          |       |
| fg       | 0.946 | 0.292 | fr       | 0.245  |   | fg       | 0.378 | 0.263 |          |       |
| fg       | 0.31  | 0.039 | fr       | 0.37   |   | fg       | 0.428 | 0.143 |          |       |
| fg       | 0.206 | 0.027 | fr       | 0.422  |   | fg       | 0.811 | 0.045 |          |       |

|    |       |       |    |       |       |    |       |       |
|----|-------|-------|----|-------|-------|----|-------|-------|
| fg | 0.526 | 0.244 | fr | 1.997 |       | fg | 0.648 | 0.433 |
| fg | 0.456 | 0.319 | fr | 0.683 |       | fg | 0.425 | 0.245 |
|    |       |       | fr | 1.176 |       | fg | 0.238 | 0.219 |
|    |       |       | fr | 0.537 |       | fg | 0.349 | 0.033 |
|    |       |       | fr | 3.026 |       | fg | 1.588 | 0.161 |
|    |       |       | fr | 2.531 |       | fg | 0.923 | 0.108 |
|    |       |       | fr | 0.683 |       | fg | 0.988 | 0.047 |
|    |       |       | fm | 0.14  | 0.079 |    |       |       |
|    |       |       | fm | 0.254 | 0.12  |    |       |       |
|    |       |       | fm | 0.038 | 0.038 |    |       |       |
|    |       |       | fm | 0.124 | 0.045 |    |       |       |
|    |       |       | fm | 0.121 | 0.069 |    |       |       |
|    |       |       | fm | 0.229 | 0.037 |    |       |       |
|    |       |       | fm | 0.177 | 0.022 |    |       |       |
|    |       |       | fm | 0.334 | 0.031 |    |       |       |
|    |       |       | fm | 0.605 | 0.097 |    |       |       |
|    |       |       | fg | 0.419 | 0.365 |    |       |       |
|    |       |       | fg | 1.1   | 0.456 |    |       |       |
|    |       |       | fg | 0.411 | 0.27  |    |       |       |
|    |       |       | fg | 0.32  | 0.029 |    |       |       |
|    |       |       | fg | 0.113 | 0.03  |    |       |       |
|    |       |       | fg | 0.184 | 0.184 |    |       |       |
|    |       |       | fg | 0.252 | 0.016 |    |       |       |
|    |       |       | fg | 0.18  | 0.103 |    |       |       |
|    |       |       | fg | 1.191 | 0.005 |    |       |       |
|    |       |       | fg | 0.169 | 0.115 |    |       |       |
|    |       |       | fg | 0.31  | 0.306 |    |       |       |
|    |       |       | fg | 0.036 | 0.036 |    |       |       |
|    |       |       | fg | 0.155 | 0.027 |    |       |       |
|    |       |       | fg | 0.133 | 0.098 |    |       |       |
|    |       |       | fg | 0.342 | 0.258 |    |       |       |
|    |       |       | fg | 0.544 | 0.418 |    |       |       |
|    |       |       | fg | 0.549 | 0.025 |    |       |       |
|    |       |       | fg | 0.85  | 0.153 |    |       |       |
|    |       |       | fg | 0.306 | 0.038 |    |       |       |
|    |       |       | fg | 0.223 | 0.101 |    |       |       |
|    |       |       | fg | 0.573 | 0.221 |    |       |       |
|    |       |       | fg | 0.294 | 0.251 |    |       |       |
|    |       |       | fg | 0.459 | 0.184 |    |       |       |
|    |       |       | fg | 0.471 | 0.246 |    |       |       |
|    |       |       | fg | 1.948 | 0.304 |    |       |       |

|    |       |       |
|----|-------|-------|
| fg | 1.272 | 0.302 |
| fg | 0.796 | 0.428 |
| fg | 1.447 | 0.533 |
| fg | 0.392 | 0.029 |
| fg | 0.3   | 0.015 |
| fg | 0.025 | 0.025 |
| fg | 0.122 | 0.122 |
| fg | 0.308 | 0.058 |
| fg | 0.736 | 0.095 |
| fg | 0.295 | 0.041 |
| fg | 0.532 | 0.023 |
| fg | 1.08  | 0.146 |
| fg | 0.971 | 0.027 |
| fg | 0.624 | 0.089 |
| fg | 0.099 | 0.045 |
| fg | 0.51  | 0.196 |
| fg | 0.467 | 0.052 |
| fg | 0.417 | 0.095 |
